# Supplementary material for: N-Allylation of amines with allyl acetates using chitosan-immobilized palladium
Source: Royal Society of Chemistry journal article supplement (doi:10.1039/c3ra47899h), 2014-01-01

## ***N*-Allylation of amines with allyl acetates using chitosan-immobilized palladium**

Nasir Baig R B, Buchi Reddy Vaddula, Michael A. Gonzalez, Rajender S. Varma\*

Table 1 Recycling of the catalyst

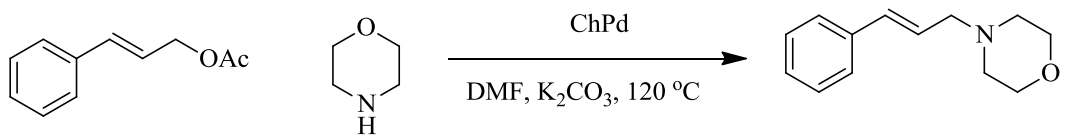

Reaction scheme: Allyl acetate + Morpholine  $\xrightarrow[\text{DMF, K}_2\text{CO}_3, 120\text{ }^\circ\text{C}]{\text{ChPd}}$  N-allylmorpholine

| Entry   | Catalyst | Time | Temp | Yield |
|---------|----------|------|------|-------|
| Cycle 1 | ChPd     | 12h  | 120  | 88%   |
| Cycle 2 | ChPd     | 12h  | 120  | 88%   |
| Cycle 3 | ChPd     | 12h  | 120  | 86%   |
| Cycle 4 | ChPd     | 12h  | 120  | 86%   |
| Cycle 5 | ChPd     | 12h  | 120  | 87%   |

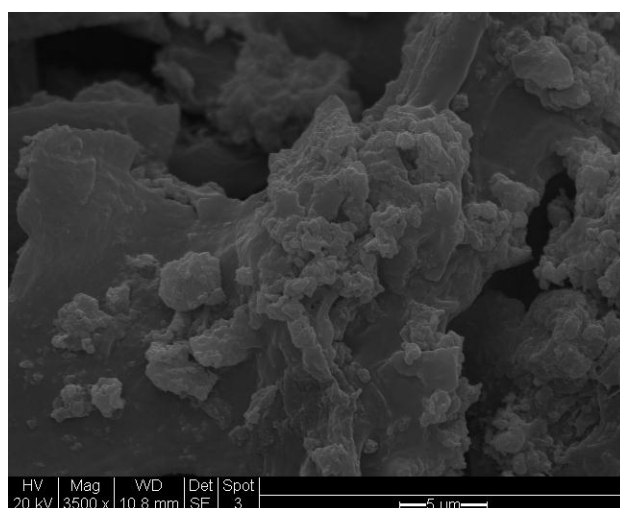

**Figure 1**

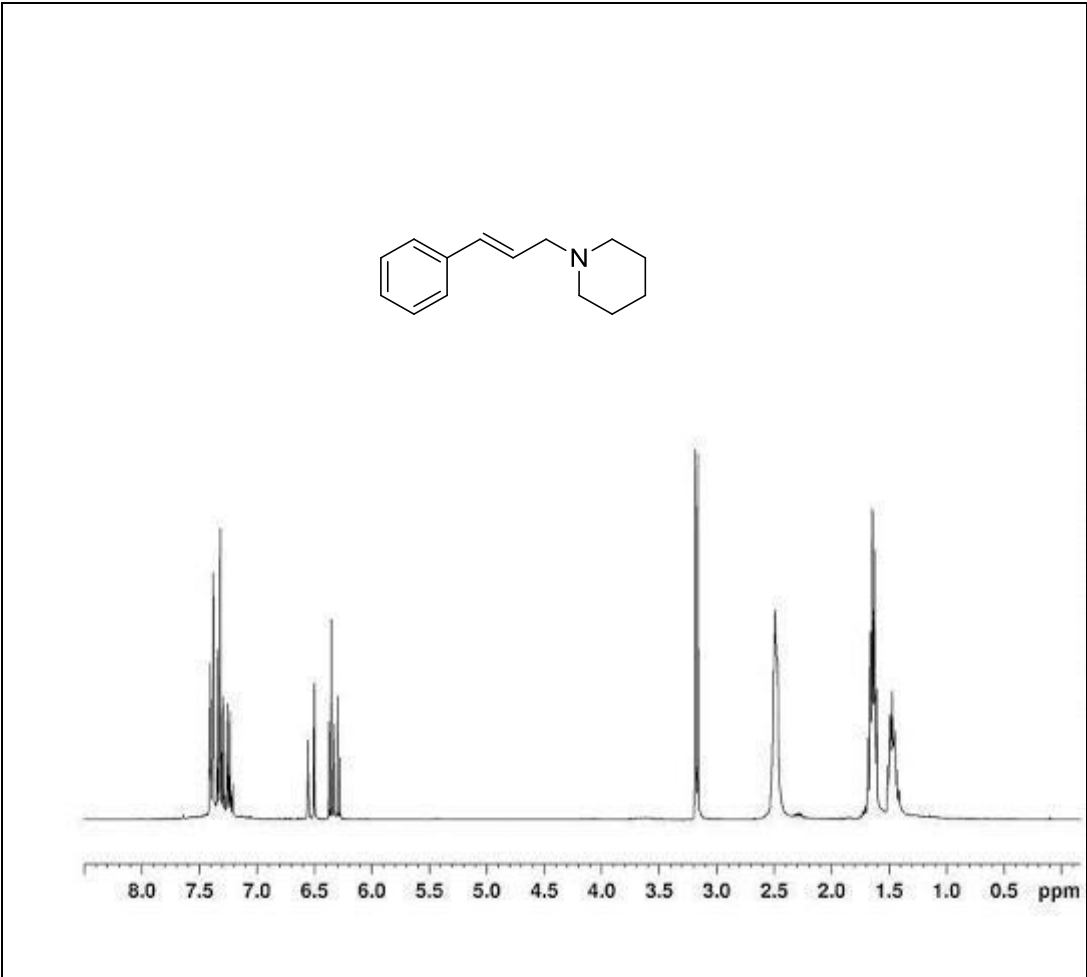

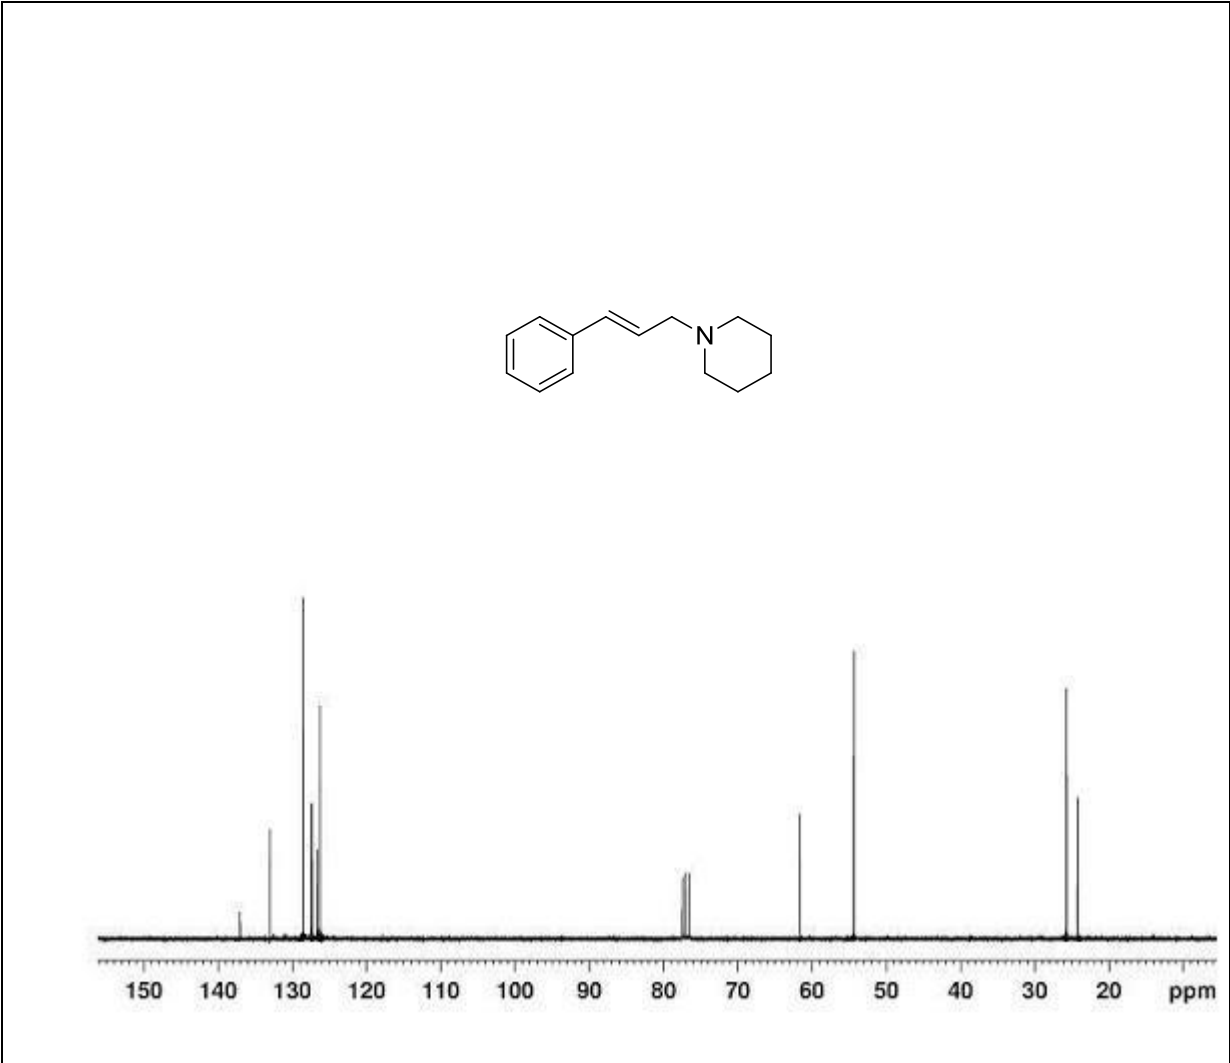

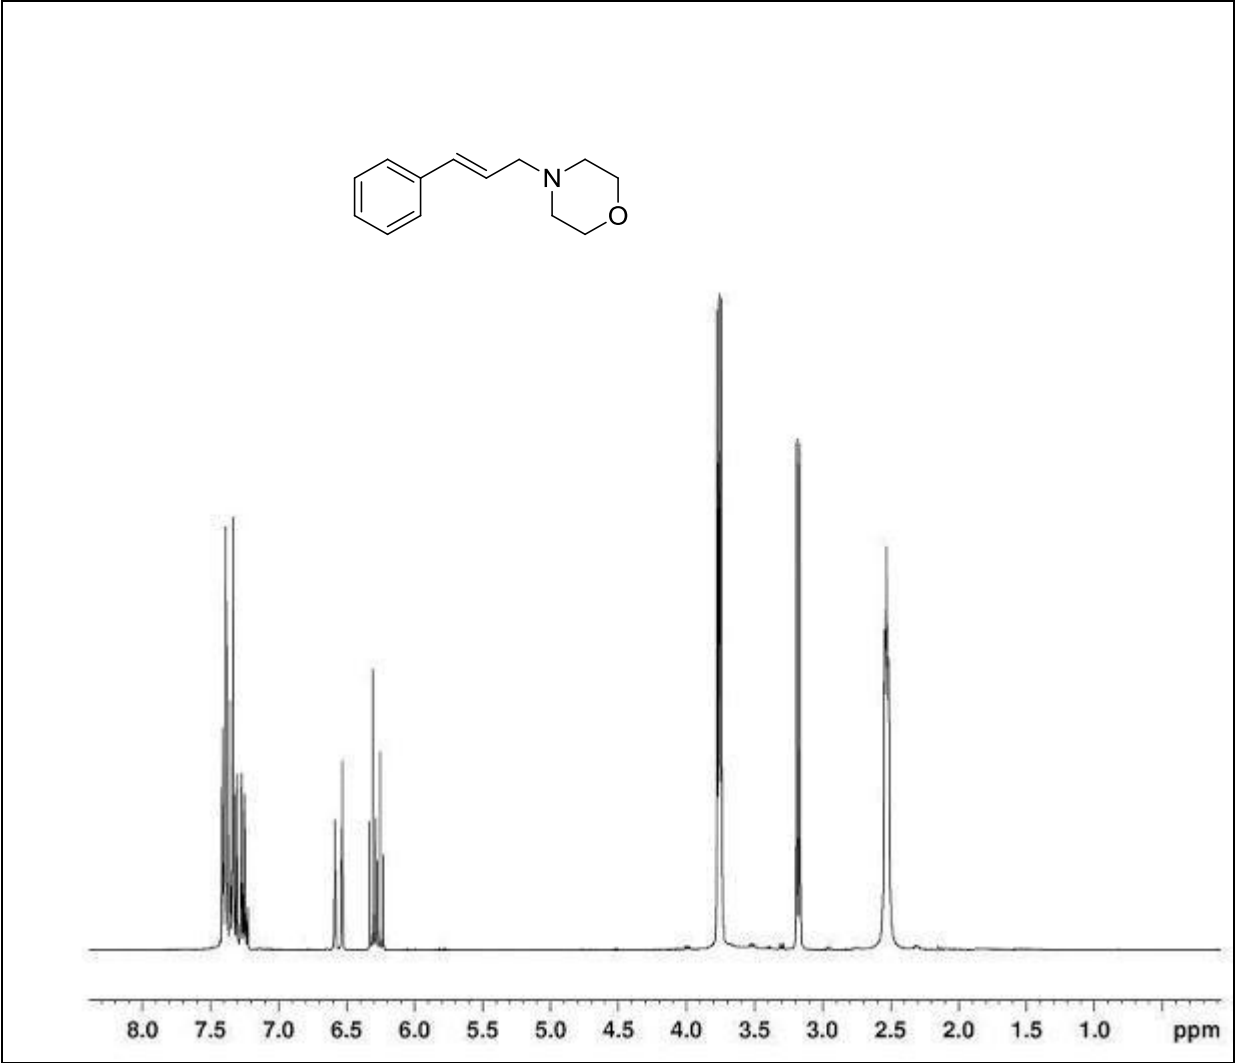

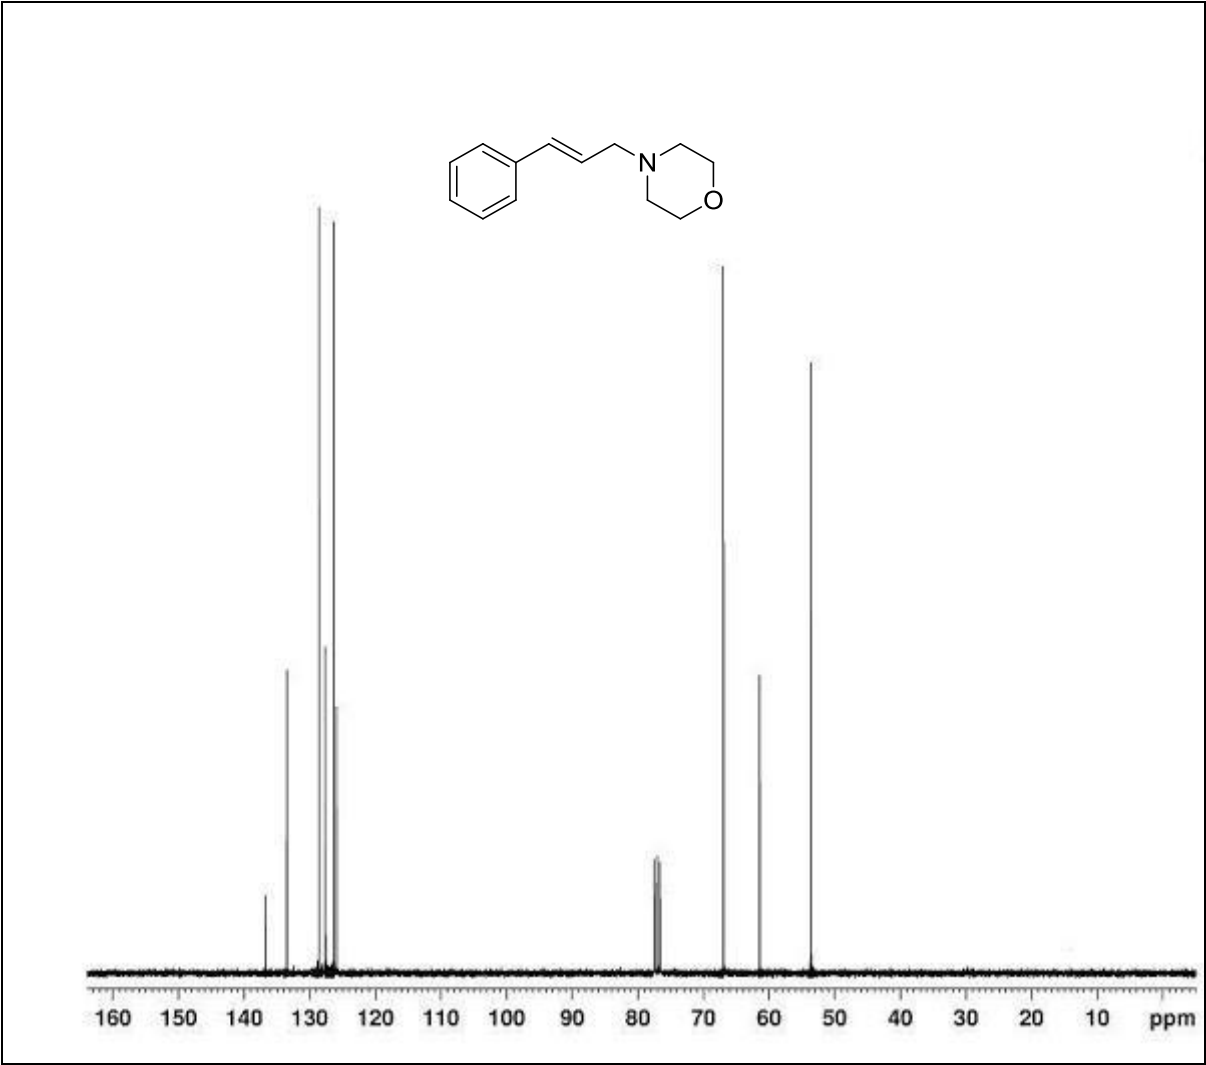

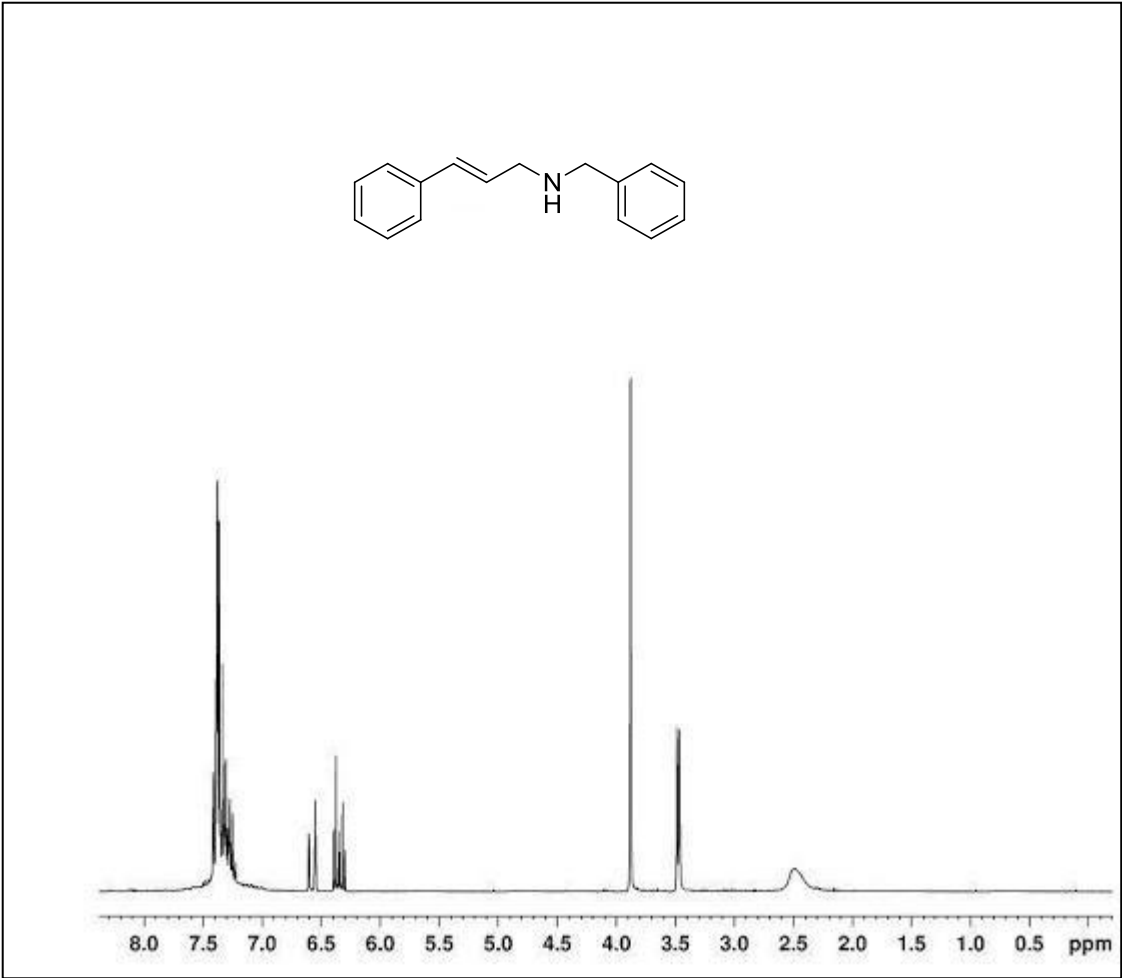

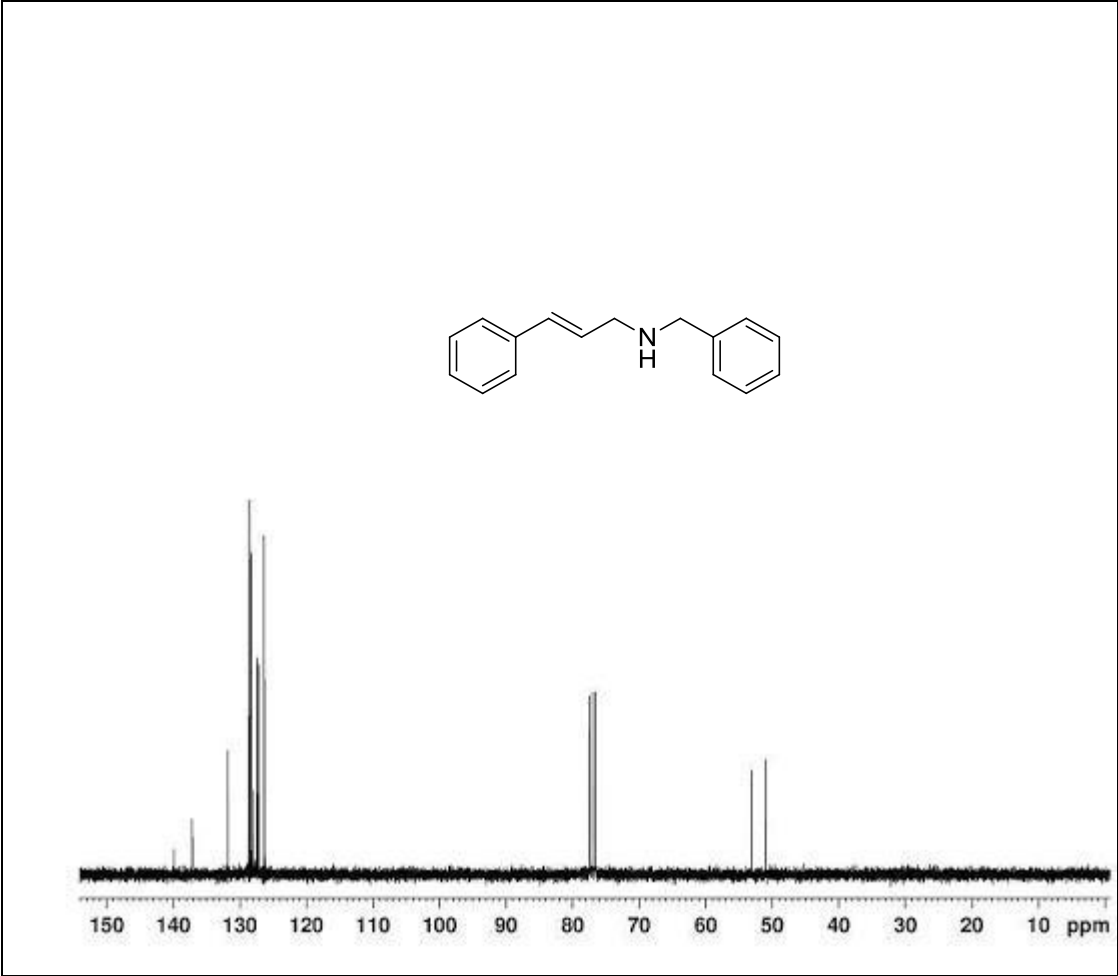

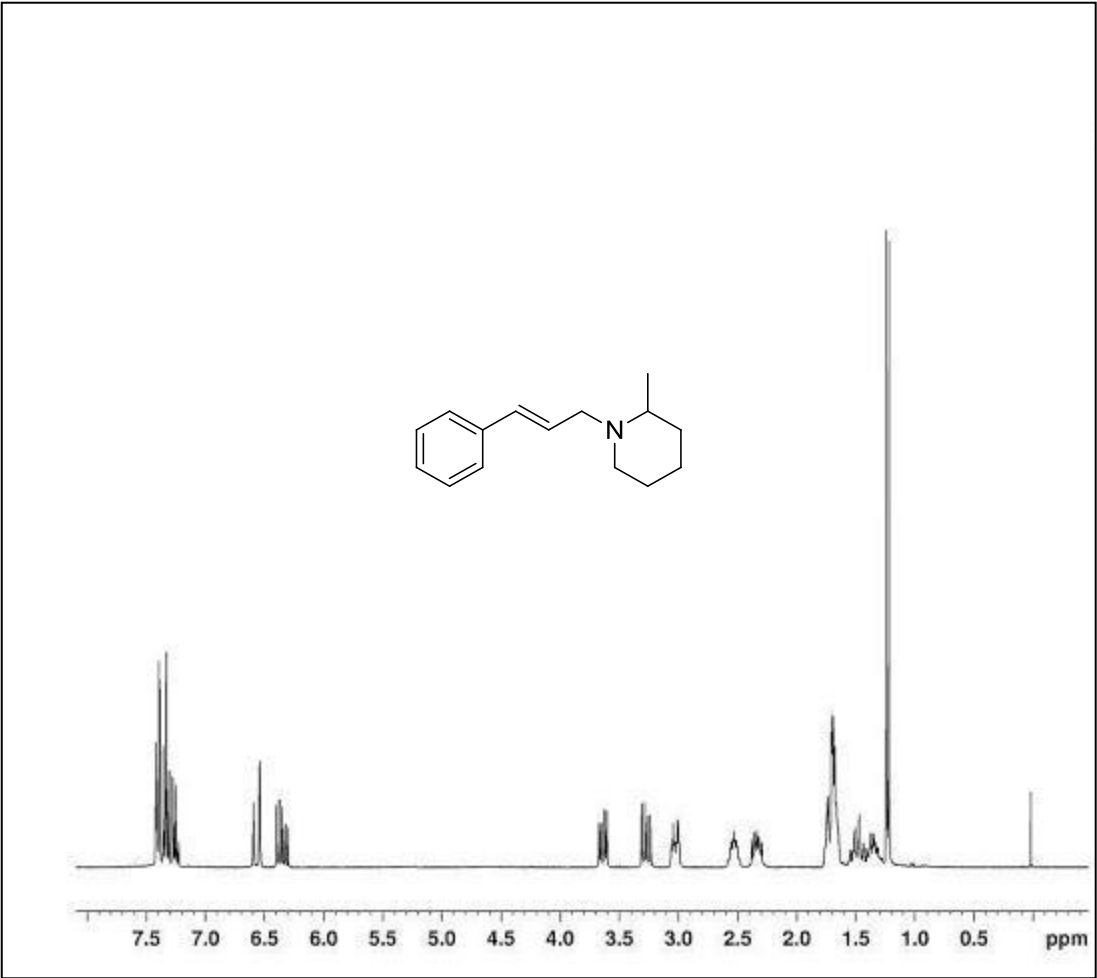



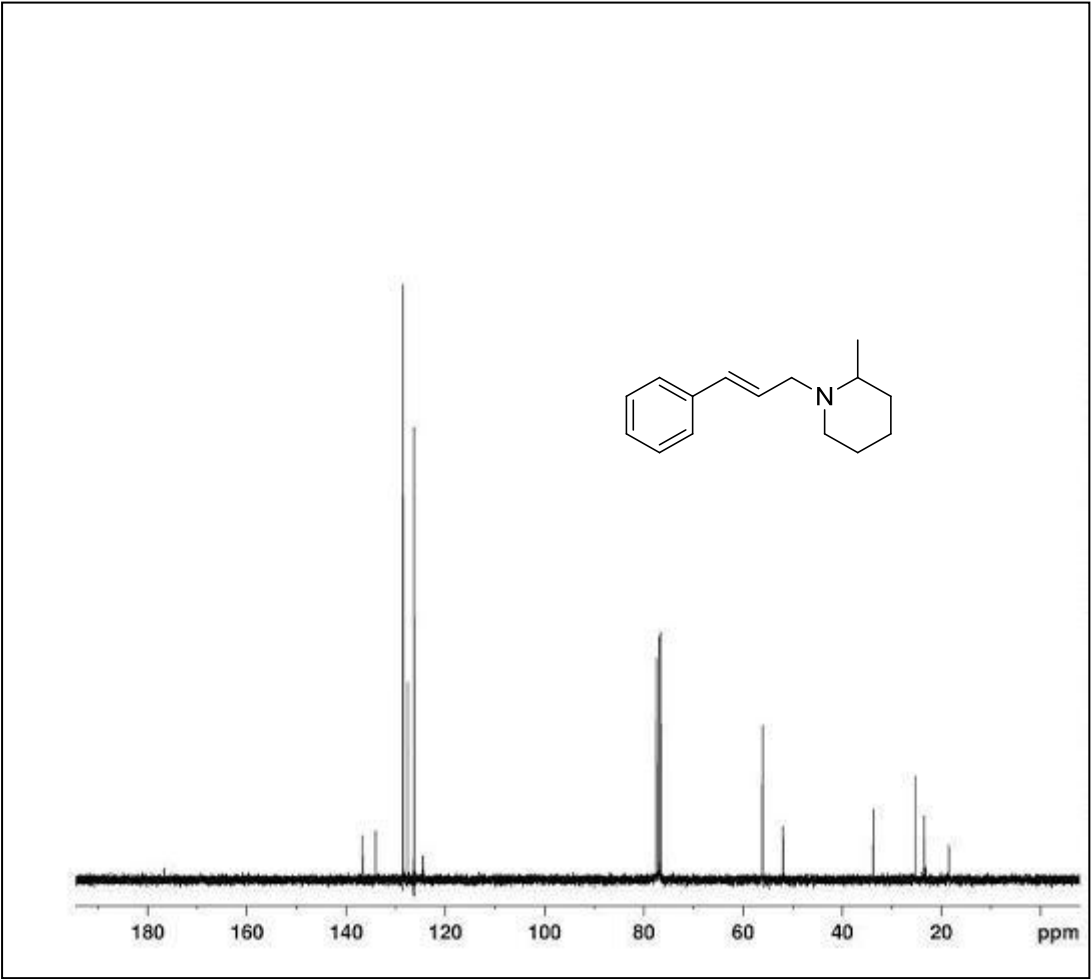

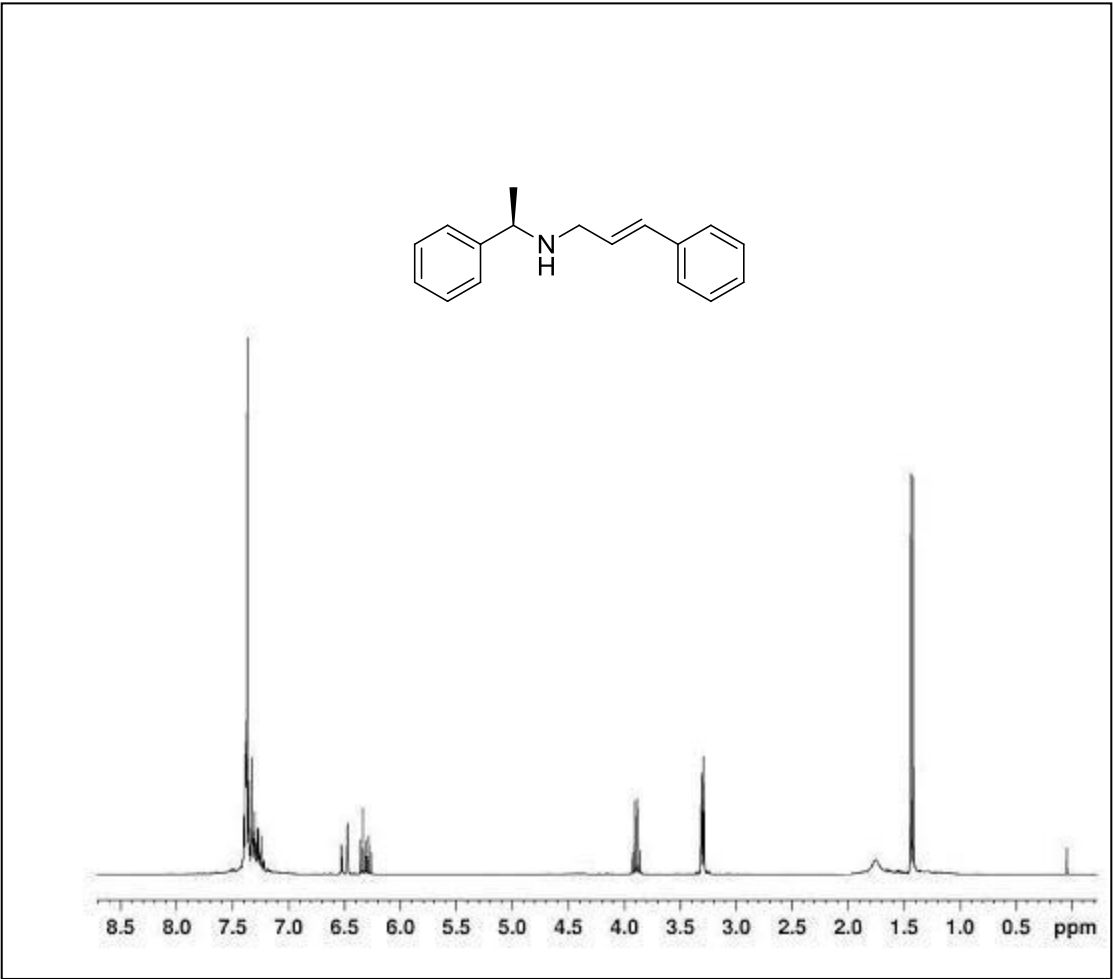

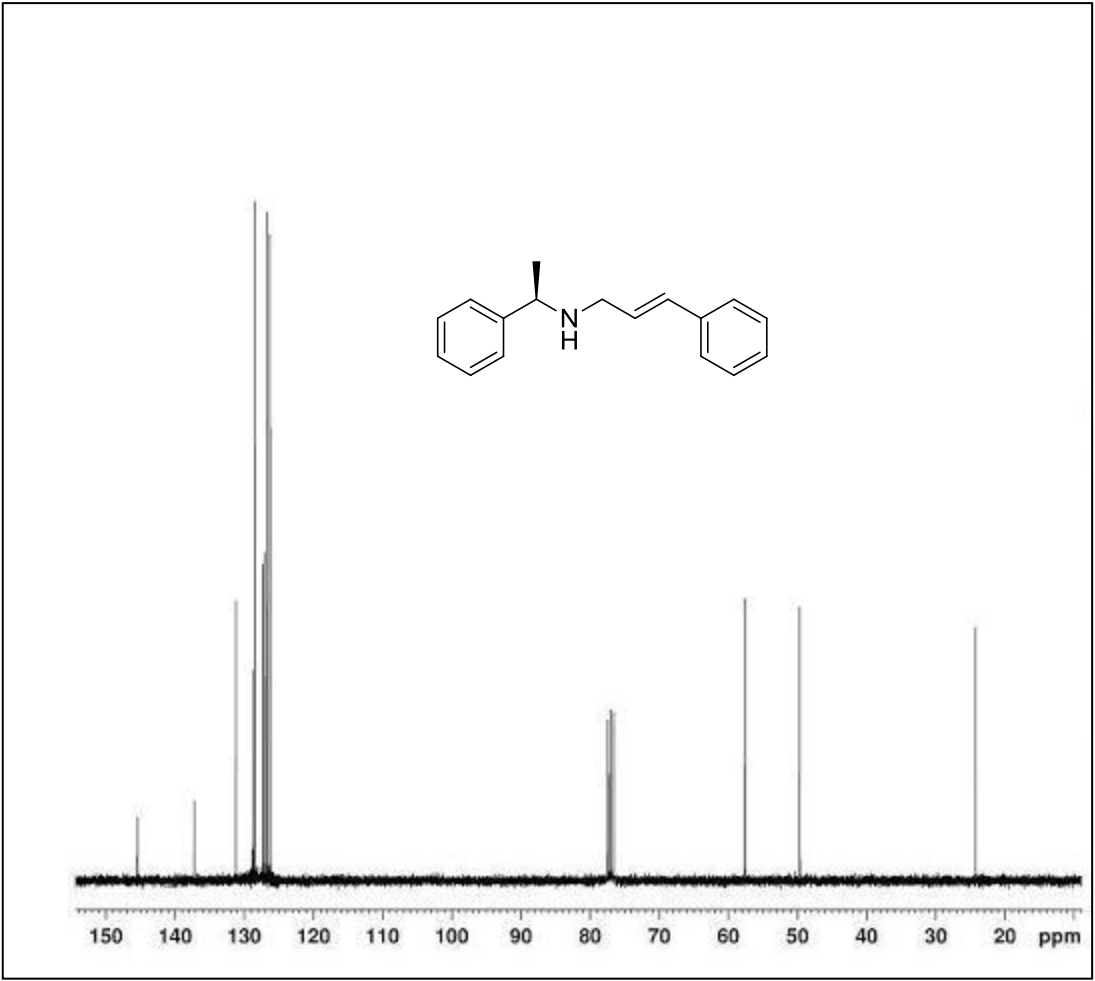

Supplement: c3ra47899h.pdf [file c3ra47899h.pdf]
